# Supplementary material for: Effect of common maintenance drugs on the risk and severity of COVID-19 in elderly patients
Source: PubMed Central journal article supplement (PMC9015134; doi:10.1371/journal.pone.0266922), 2022-04-18

S1 Figure. Consort diagram

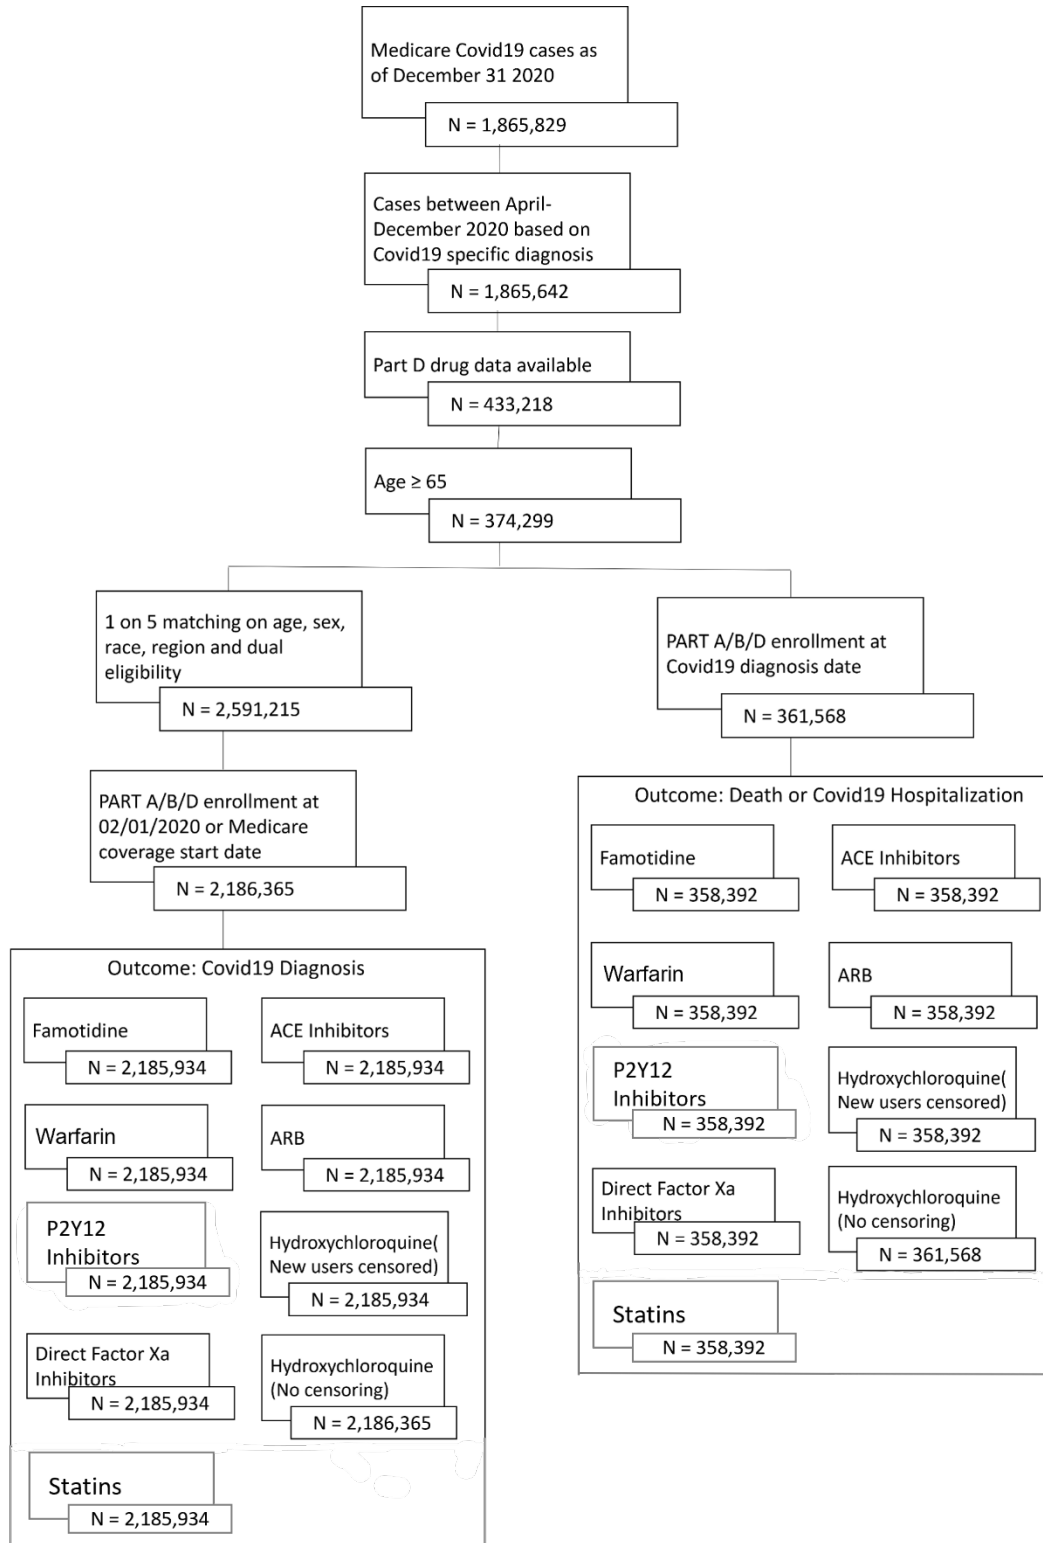

Supplement: pone.0266922.s001.pdf [file pone.0266922.s001.pdf]
