# Supplementary material for: Effect of common maintenance drugs on the risk and severity of COVID-19 in elderly patients
Source: PubMed Central journal article supplement (PMC9015134; doi:10.1371/journal.pone.0266922), 2022-04-18

S2 Figure. Trends of drug usage in 2019 and 2020 (w/o: without; w/: with)

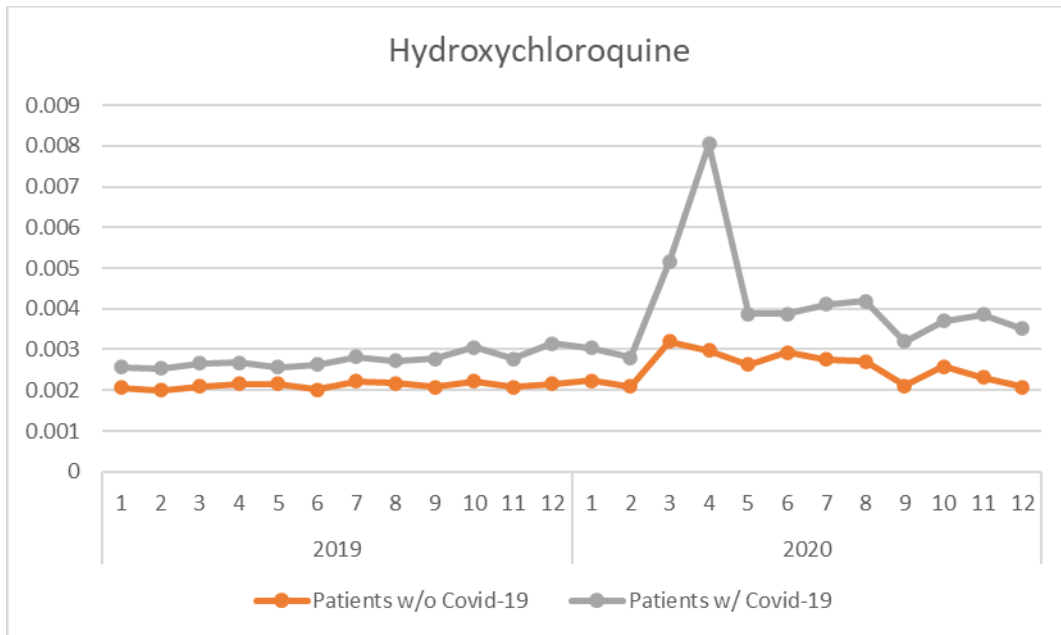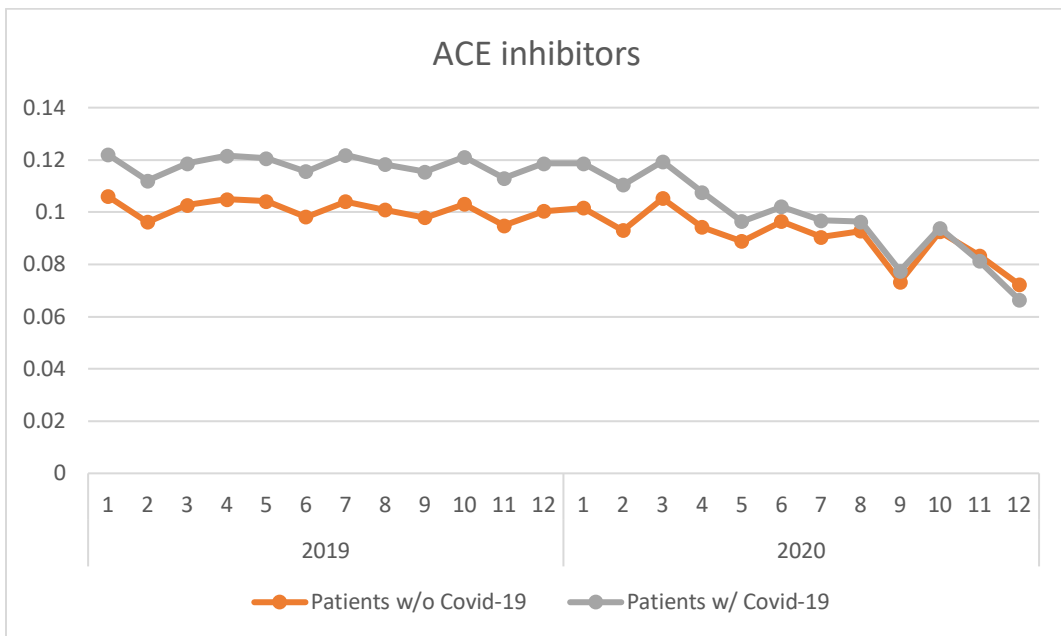

### Angiotensin II receptor blockers (ARB)

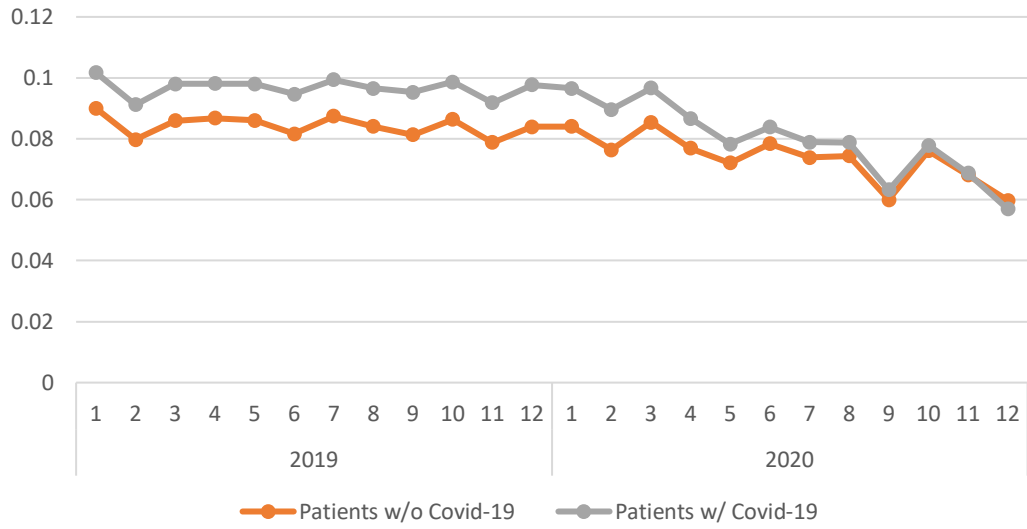

### Statins

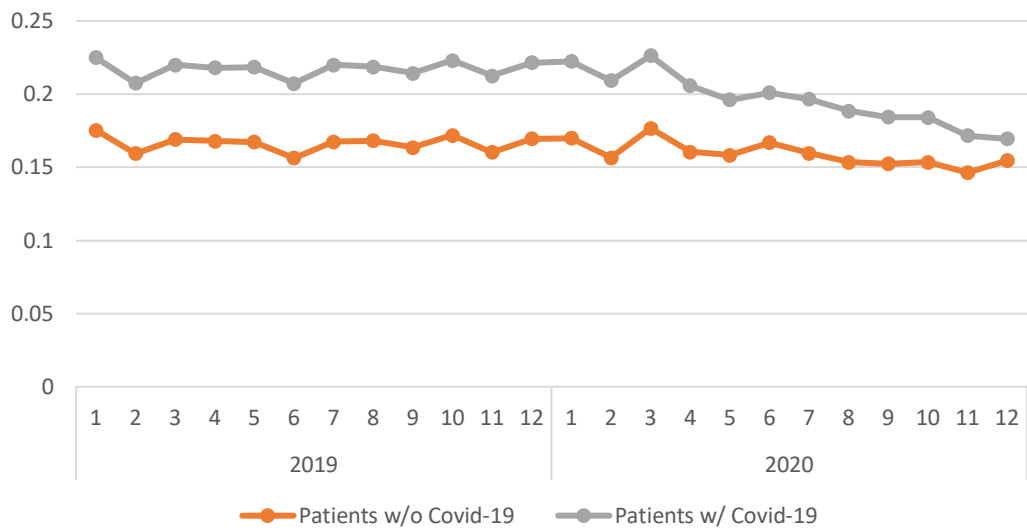

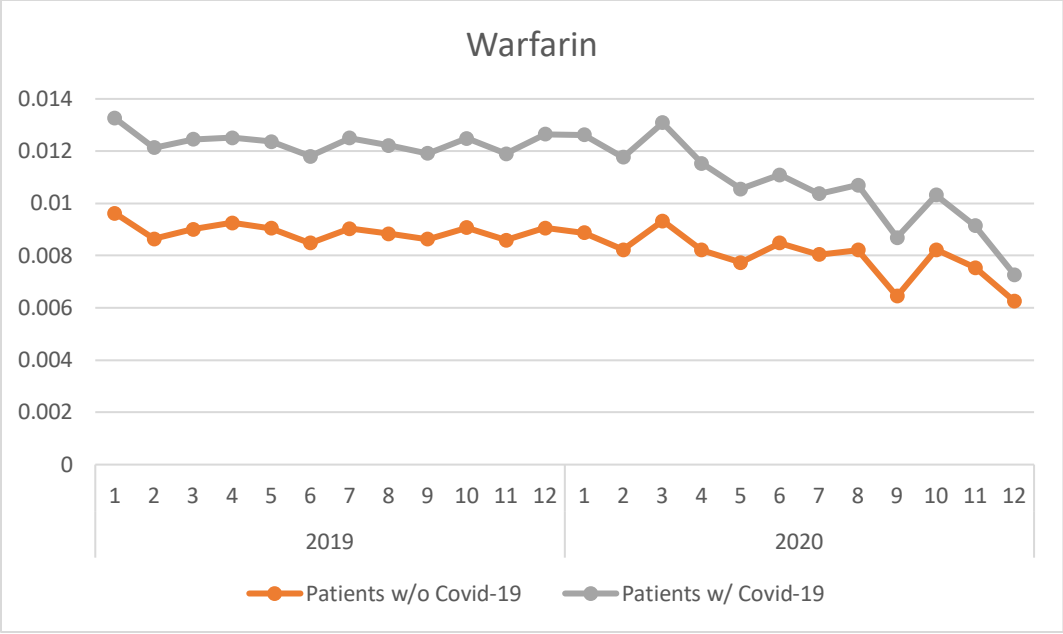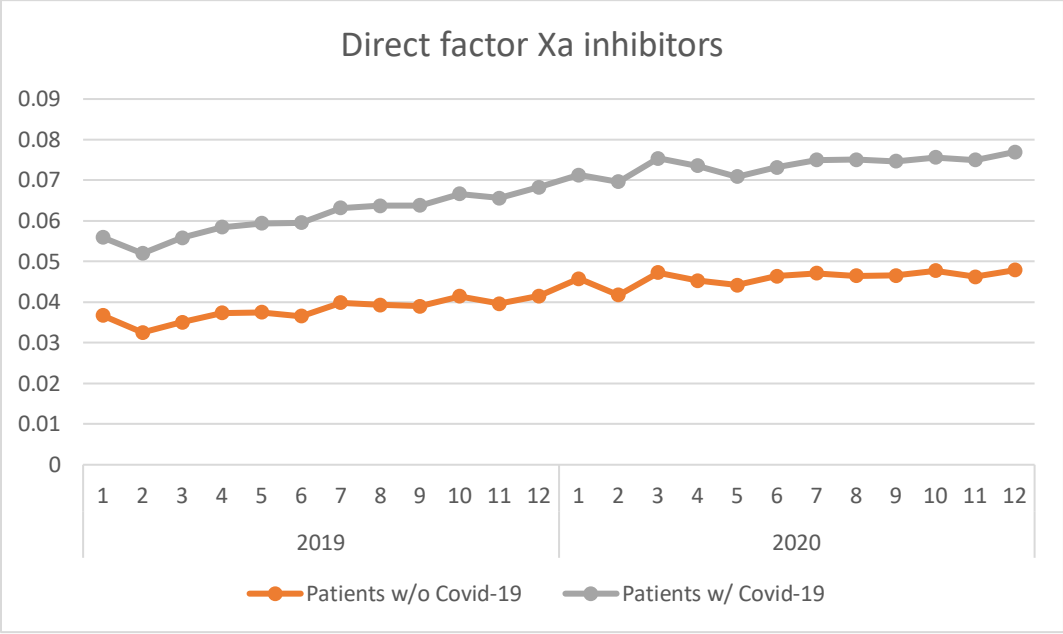

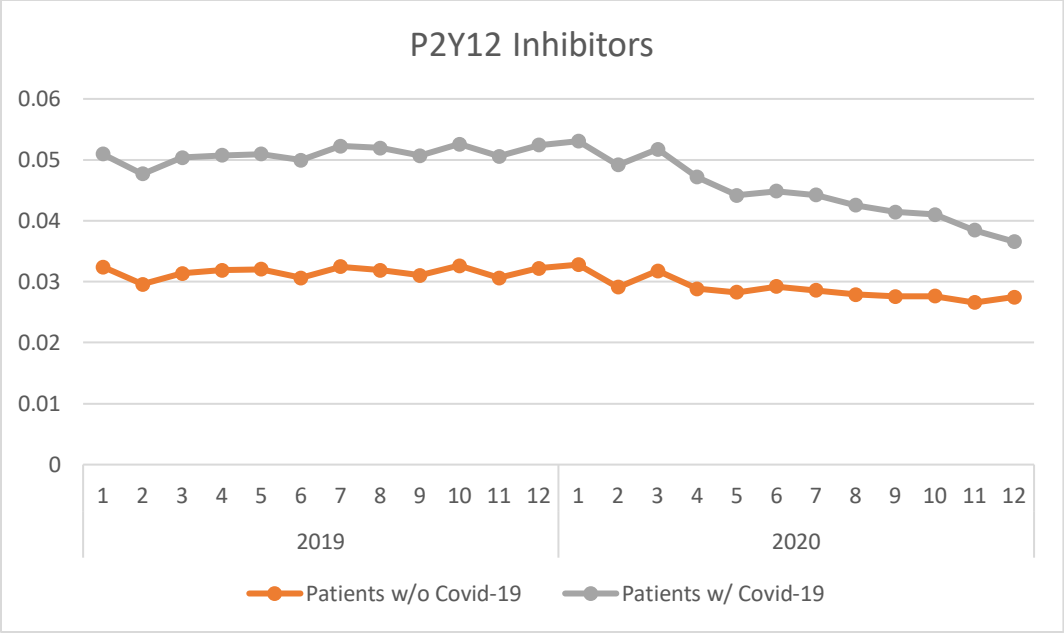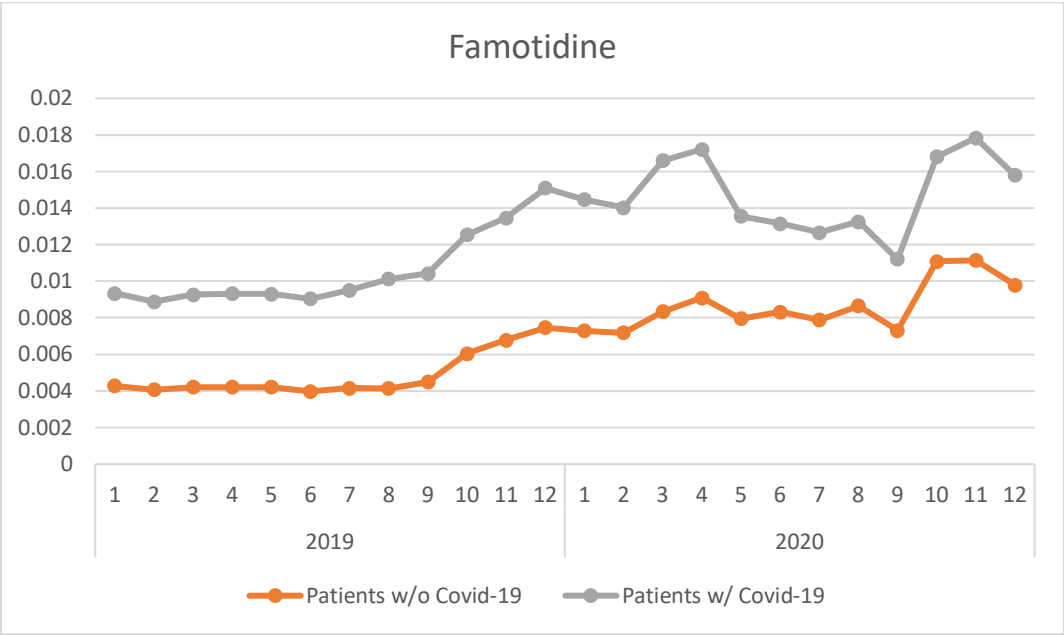

Supplement: pone.0266922.s002.pdf [file pone.0266922.s002.pdf]
